# Clinical Measurement of Arterial Stiffness Obtained From Noninvasive Pressure Waveforms

Wilmer W. Nichols

Aortic pulse wave velocity (PWV) and augmentation index are independent predictors of adverse cardiovascular events, including mortality. In hypertension and aging, central elastic arteries become stiffer, diastolic pressure decreases, and central systolic and pulse pressures are augmented due to increased PWV and early return of reflected waves to the heart from the periphery. Valuable information on arterial properties such as stiffness can be obtained from both central (aortic) and peripheral (radial artery) pressure waveforms, but absolute values of wave reflection amplitude and wasted left ventricular (LV) pressure energy can only be obtained from the central arterial pressure waveform. As the arterial system becomes stiffer, there is a marked increase in central systolic and pulse pressures and wasted LV energy, along with a decrease in pulse pressure amplification. The increase in aortic systolic and pulse pressures are due primarily to increases in PWV and wave reflection amplitude with a small increase in incident wave amplitude. In individuals with very stiff elastic arteries (eg, in older persons with isolated systolic hypertension), there is a decrease in diastolic pressure. These changes in pressure components increase LV afterload and myocardial oxygen demand and therefore cause

an undesirable mismatch between ventricle emptying and arterial pulse wave transmission, which promotes ventricular hypertrophy. High systolic and pulse pressures resulting from advanced age or hypertension increase circumferential arterial wall stress, which likely causes breakdown of medial elastin and increases the possibility of local fatigue, endothelial damage and development of atherosclerosis. Vasodilator drugs may have little direct effect on large central elastic arteries, but at the same time, their effects on peripheral muscular arteries reduce wave reflection amplitude and markedly lower systolic and pulse pressures and ventricular afterload. These beneficial effects on central arterial pressure can occur with or without a reduction in cuff blood pressure (BP) and may explain the apparent "pressure-independent" effects of drugs such as angiotensin-converting enzyme inhibitors and angiotensin receptor blockers. Therefore, optimal treatment of high BP and its complications should include consideration of arterial stiffness, augmentation of aortic pressure, and LV wasted energy, all of which should be reduced to the lowest possible level. *Am J Hypertens* 2005;18:3S-10S © 2005 American Journal of Hypertension, Ltd.

"However eloquent may be the words of a writer, he cannot in a page convey as clear an idea of the rhythm of the heart as a simple pulse-tracing, and if writers had given us more pulse-tracings, their works would have been greatly enhanced in value."  
(James Mackenzie, 1902)

**T**he association between blood pressure (BP) and major cardiovascular events including stroke, myocardial infarction, organ damage, and mortality are well documented in both normotensive and hypertensive individuals, and this association is greatly influenced by age. Numerous observational epidemiologic studies and clinical trials, including the Framing-

ham Heart Study, have shown a strong positive and continuous association between brachial artery sphygmomanometric systolic and pulse pressures and adverse cardiovascular events,<sup>1-6</sup> especially in individuals >50 years of age.<sup>7</sup> Furthermore, in a meta-analysis of seven randomized clinical trials, a J-shaped relationship between minimum diastolic BP and cardiovascular mortality was found.<sup>8</sup> Because systolic, diastolic, and pulse pressures are related to the physical properties of elastic arteries, attention has been directed toward arterial stiffness, pulse wave velocity (PWV), and wave reflections as cardiovascular risk factors.<sup>9,10</sup> Indeed, independent studies have shown that central arterial stiffness is increased in older individuals<sup>11</sup> and in those with coro-

Received September 30, 2004. Accepted October 4, 2004.

From the Department of Medicine/Cardiology, University of Florida College of Medicine, Gainesville, Florida.

Address correspondence and reprint requests to Dr. Wilmer W. Nichols, Department of Medicine/Cardiology, Box 100277, University of Florida, Gainesville, FL 32610; e-mail: nichoww@medicine.ufl.edu

nary artery disease,<sup>12</sup> myocardial infarction,<sup>13</sup> heart failure,<sup>14</sup> hypertension,<sup>15,16</sup> stroke,<sup>17</sup> diabetes mellitus,<sup>18,19</sup> end-stage renal disease,<sup>20,21</sup> hypercholesterolemia,<sup>22</sup> and inflammation.<sup>23,24</sup>

## Pressure Differences Within the Arterial Tree

As the pressure wave travels from the heart to the periphery, both systolic and pulse pressures increase markedly, whereas diastolic and mean pressures decrease only slightly due to progressive increase in arterial stiffness and to the summated effects of incident and reflected waves. Thus, both systolic and pulse pressures are greater in the arm and leg than in the ascending aorta.<sup>25</sup> The degree of amplification, which can differ widely between individuals, is related to the difference between elastic moduli of the respective arteries and distance to reflection sites.<sup>25</sup> Therefore, brachial artery (cuff) BP is not always a reliable measure of ascending aortic pressure and thus is not always a good predictor of left ventricular (LV) afterload and LV mass, which is an independent predictor of heart failure and coronary heart disease–related mortality.<sup>26</sup> Recent studies have shown that central artery pulse pressure is a better predictor of carotid intima-media thickness,<sup>27</sup> restenosis after coronary angioplasty,<sup>28</sup> coronary artery disease severity,<sup>29</sup> and mortality in end-stage renal disease.<sup>30</sup> Moreover, the beneficial reduction in ascending aortic systolic and pulse pressures with vasodilator drugs is often underestimated by cuff measurements of brachial artery pressure.<sup>31,32</sup> This disparity is due to amplitude and timing of reflected pressure waves from the periphery.<sup>33,34</sup>

## Central Artery Pressure Waves

Figure 1 (top) depicts a high-fidelity aortic pressure wave (synthesized from the radial artery pressure wave using a generalized transfer function), with pulse or amplitude ( $P_s - P_d$ ) determined by the interaction of a LV ejected forward-traveling “incident” wave (amplitude,  $P_i - P_d$ ) and a late-arriving reflected wave (amplitude,  $P_s - P_i$ ) from the lower body. The characteristics of the incident wave depends largely upon the elastic properties of the central aorta and is not influenced by wave reflections.<sup>25,33</sup> The characteristics of the reflected wave depends on a more complex set of determinants, namely, the elastic properties of the entire arterial tree (elastic plus muscular arteries and, to a lesser extent, the arterioles), PWV, the round-trip travel time ( $\Delta t_p$ ) of the wave from the heart to the periphery and back, and the distance to the major reflecting sites.<sup>25,33</sup>

Aortic augmentation index ( $AI_a$ ) is related to arterial properties via changes in PWV. Increased arterial stiffness increases PWV and causes early return (ie,  $\Delta t_p$  decreases) of the reflected wave from peripheral reflecting sites to the heart during systole when the ventricle is still ejecting blood.<sup>34</sup> As  $\Delta t_p$  decreases, reflected wave amplitude ( $P_s - P_i$ ) increases and systolic duration ( $\Delta t_s$ ) of the wave in-

creases. This mechanism augments ascending aortic systolic and pulse pressures, an effect that increases arterial wall stress, potentiates the development of atherosclerosis, elevates LV afterload, and increases LV mass and oxygen demand while decreasing stroke volume.<sup>34</sup> Because this wave reflection–associated boost in pressure does not contribute positively to ejection of blood, the effect of the extra workload is wasted (pressure) energy ( $2.09\Delta t_r[P_s - P_i]$ ) the ventricle must generate to overcome this augmented aortic pressure.<sup>35</sup> Accordingly, optimal treatment for high central systolic and pulse BP (cardiac afterload) should focus not only on increasing arteriolar caliber and reducing peripheral resistance but also on arterial stiffness, PWV, wave reflection characteristics, and LV wasted energy.<sup>36,37</sup> Correct calculation of these variables (that is, augmentation index, incident and reflected wave amplitude and travel time, distance to reflection sites, and wasted LV energy) depends on the accurate determination of the inflection point ( $P_i$ ).<sup>25,33</sup>

## Peripheral Artery Pressure Waves

The shape of peripheral artery pressure waves are also influenced by arterial stiffness, PWV, and wave reflections (Fig. 1, bottom).<sup>25,38</sup> The radial artery pressure wave is composed of three waves: an incident wave generated by blood flow and two reflected waves, one from the hand region and a later-arriving wave from the lower body. The radial artery augmentation index ( $AI_r$ ) is defined<sup>39</sup> as  $P_2/P_1$ . As the elastic arteries become stiffer, PWV increases and the reflected wave from the lower body returns earlier to the radial artery, migrates up the pressure wave toward peak systolic pressure, and thus causes a decrease<sup>40</sup> in  $\Delta T_{DVP}$  and an increase in  $AI_r$  (Fig. 2, top left). There is a positive relationship between  $AI_a$  and  $AI_r$  (Fig. 2, bottom), and both can be used as estimates of arterial stiffness.<sup>22,40</sup> However, care must be taken when interpreting inter-individual differences in the augmentation index or in using it as an index of arterial stiffness because of its dependence on both heart rate<sup>41,42</sup> and body height.<sup>43</sup>

## Pressure Dependence of Arterial Stiffness

Elastic properties of the arterial wall are highly pressure dependent. At low levels of arterial pressure, wall stress is supported by compliant elastin fibers, whereas at higher levels of pressure, wall stress is supported by much stiffer collagen fibers.<sup>25</sup> An increase in elastic artery stiffness is related to arterial wall composition and occurs over a long period, for example, with advancing age, hypertension, and arteriosclerosis. Acute changes can occur in elastic arteries with changes in distending pressure, but these changes are passive. For example, during vasodilation, both pressure and diameter decrease in elastic arteries, causing a passive decrease in wall stiffness and a decrease in PWV. A change in stiffness of muscular arteries is

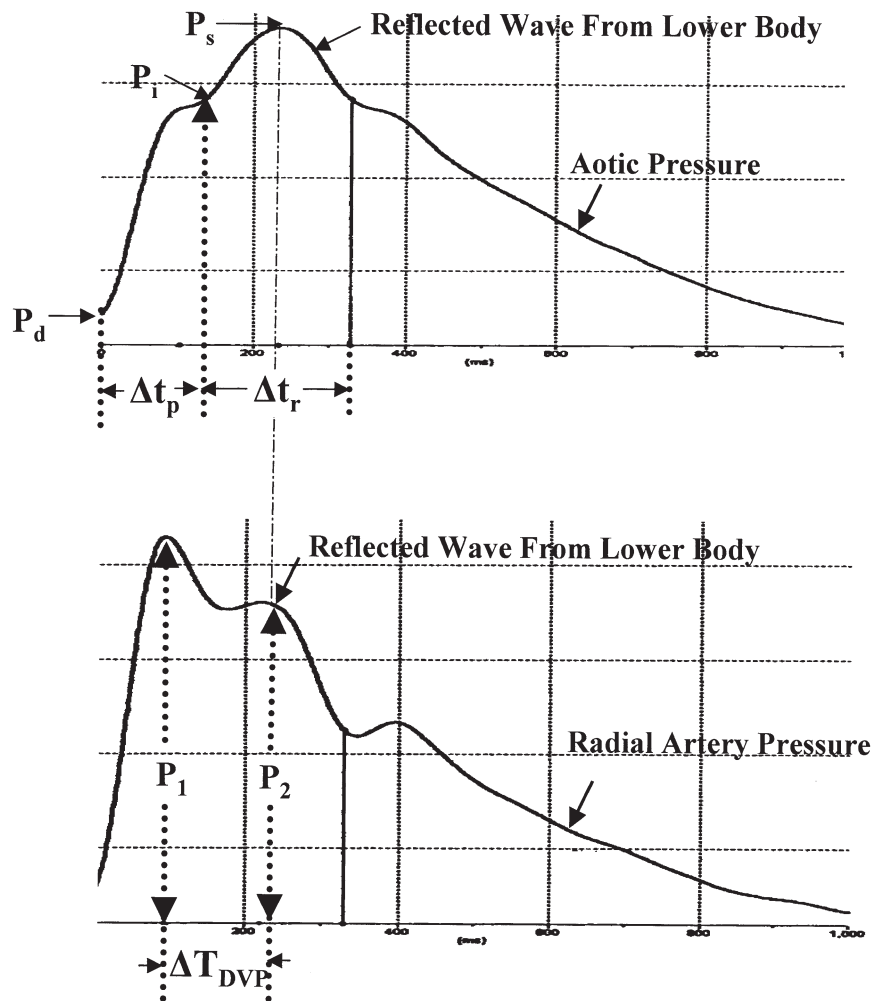

**FIG. 1 Top** Aortic pressure wave synthesized from the measured radial artery pressure wave (applanation tonometry) using a generalized transfer function. The abbreviation  $P_s$  indicates peak systolic pressure;  $P_i$  is an inflection point that indicates the beginning upstroke of the reflected pressure wave;  $P_d$  is minimum diastolic pressure;  $\Delta t_p$  is the round trip travel time of the forward (or incident) wave from the ascending aorta to the major reflecting site and back; and  $\Delta t_r$  is the systolic duration of the reflected pressure wave. Pulse pressure is  $(P_s - P_d) = (P_i - P_d) + (P_s - P_i)$ . Augmentation index ( $AI_a$ ) =  $(P_s - P_i) / (P_s - P_d)$  and wasted LV pressure energy ( $E_w$ ) =  $2.09\Delta t_r (P_s - P_i)$ . **(Bottom)** Noninvasive high-fidelity recording of the radial artery pressure wave. The wave has been shifted leftward to align with the aortic pressure wave. The variations in the pressure wave, like those of the aortic pressure wave, are due to wave reflections from the lower body superimposed on the wave. The abbreviation  $P_1$  is the sum of the incident (ejected) wave and reflected wave (from hand);  $P_2$  is the peak of the reflected wave from the lower body minus end-diastolic pressure;  $P_2/P_1$  is the radial artery augmentation index ( $AI_r$ ); and  $\Delta T_{DVP}$  is the difference between the first two peaks of the pressure wave and has been used as a measure of arterial stiffness.

primarily due to acute changes in smooth-muscle tone. During vasodilation, diameter increases whereas pressure decreases,<sup>34</sup> causing a decrease in arterial stiffness and PWV; vasoconstriction increases stiffness and has the opposite effect. Advancing age and hypertension have little effect on stiffness of muscular arteries in humans, and drugs have little effect on stiffness of elastic arteries.<sup>25,44</sup>

### Aging and Hypertension: Effects on Arterial Stiffness and Wave Reflections

With the passage of time, the walls of systemic arteries undergo certain histologic changes. These changes occur independently of alterations attributed to atheroscle-

rosis. The principal changes with age occur in the arterial intima (which undergoes hyperplasia) and the media. In the load-bearing media, the elastic fibers and laminae lose the orderly arrangement seen early in life and display thinning, splitting, fraying, and fragmentation. The age-related thinning and fragmentation of elastin and the increase in collagen are not seen in muscular arteries. Collagen in the human aorta is much stiffer (at least 500 times) than elastin, and it more than doubles in content from age 20 to 70 years.<sup>25</sup> As a result, age and hypertension are associated with alterations in the elastic properties of the arterial wall that cause profound changes in arterial pressure waves, including increases in both radial artery (Fig. 2, upper left) and aortic augmentation (Fig. 2, upper right) indi-

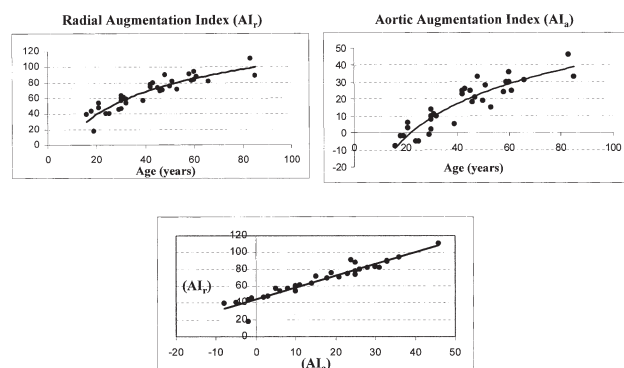

**FIG. 2** Age-related changes in radial (**left**) and aortic (**right**) augmentation indices (%) and their relationship (**bottom**).

ces. These changes are attributed primarily to the changes in amplitude and timing of pulse wave reflections from peripheral reflecting sites in the lower body.

Age is an important determinant of arterial wave reflection characteristics.<sup>25,33</sup> In youth, the reflected wave occurs in diastole in both the radial artery and aorta (**Fig. 3, top**) and aids coronary artery and myocardial perfusion, but with increasing age (**Fig. 3, middle and bottom**), the elastic arteries stiffen, increasing PWV and causing the reflected wave to occur in systole with greater amplitude and systolic duration. This modification in wave reflection characteristics causes a decrease in stroke output and a corresponding decline in coronary artery perfusion pressure. Radial and aortic systolic pressures increase whereas diastolic pressure increases to middle age (**Fig. 3, middle**) and then decreases (**Fig. 3, bottom**).<sup>45</sup> In the three individuals shown in **Fig. 3**, pulse pressure in the radial artery doubled, whereas pulse pressure in the ascending aorta tripled, causing amplification (brachial/aortic pulse pressure) to decrease from 1.7 to 1.1. Migration of the reflected wave (leftward in **Fig. 3**) into systole increased both radial

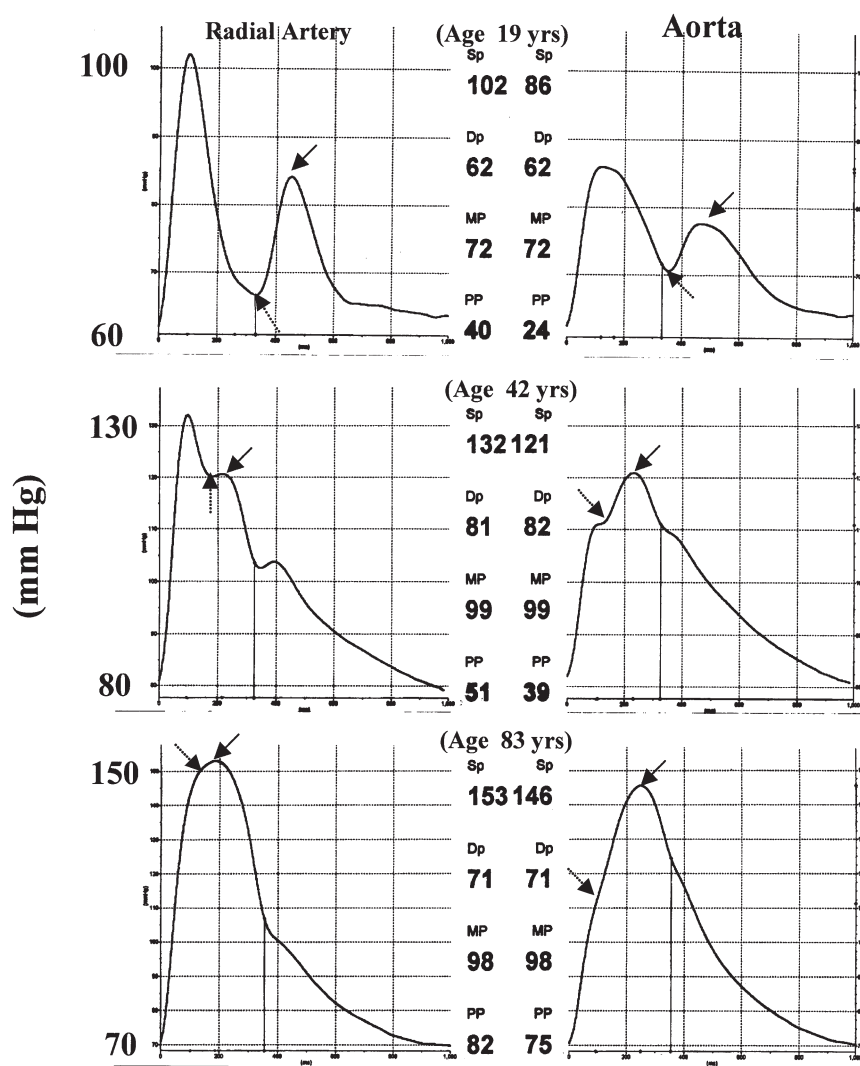

**FIG. 3** Noninvasive recordings of radial artery pressure waves (**left**) and synthesized aortic pressure waves (**right**) in three healthy individuals to illustrate the age-related changes in wave reflection characteristics and pressure wave shapes. **Solid arrows** identify the peak of the reflected waves, and **broken arrows** indicate the beginning upstroke of the reflected waves (see text for explanation).



artery and aortic augmentation indices (see Fig. 2).  $\Delta t_p$  decreases, whereas  $\Delta t_r$  increases causing wasted LV pressure energy to increase from 0.0 to  $16.3 \times 10^3$  dyne-sec/cm<sup>2</sup>.

Wave reflection characteristics are amplified in patients with systemic hypertension. An increase in aortic stiffness alone only causes an increase in aortic pulse pressure (for a given stroke volume), with little change in wave contour. Major changes in wave contour are due to alterations in amplitude and timing of wave reflections. Increased arterial stiffness is likely due to several entities occurring simultaneously over a long period. These include decreased elastin, increased collagen, increased calcium content of the arterial wall, increased plasma creatinine and norepinephrine, decreased  $\beta$ -receptor tone of smooth-muscle cells, decreased release of nitric oxide, and increased release of endothelin.

Changes in physical properties of the arterial tree are probably accelerated in some individuals because of adverse lifestyle aspects such as smoking,<sup>46</sup> overeating,<sup>47</sup> and excess alcohol consumption,<sup>48</sup> thereby causing an abnormal increase in arterial stiffness, pulse pressure, and systolic stress. Left ventricular afterload, ascending aortic and radial artery pulse pressures, and augmentation indices are increased by arterial stiffening and increased wave reflection amplitude, all of which are alterations associated with aging and hypertension,<sup>25,44</sup> LV hypertrophy,<sup>49,50</sup> and arterial wall damage—major cardiovascular, cerebrovascular, and renovascular risk factors.<sup>51</sup>

## Effects of Pharmacologic Intervention on Arterial Stiffness and Wave Reflections

The long-term beneficial effects of lowering arterial BP on cardiovascular events (eg, myocardial infarction, stroke, and mortality) have been well documented in large clinical trials in both hypertensive<sup>31,32,52–56</sup> and normotensive patients.<sup>57,58</sup> When initiating antihypertensive or BP-lowering drug therapy, an optimal BP should be targeted. However, it must be realized that aggressive BP reduction can, at least theoretically, be detrimental to central and peripheral organ perfusion, particularly in the setting of severe coronary artery disease.<sup>8,34,50</sup> In general, however, lower BP is associated with better outcome. Although brachial BP  $\geq 140/90$  mm Hg is the standard definition of hypertension,<sup>59</sup> a recent meta-analysis has confirmed that a brachial pressure of 115/75 mm Hg is associated with the lowest mortality rate and that the mortality rate doubles with each 20/10 mm Hg increment in brachial BP.<sup>60</sup>

Different vasodilator drugs have different effects on arteries and arterioles.<sup>61</sup> Arteriolar vasodilators primarily increase arteriolar caliber and therefore decrease peripheral resistance and mean arterial pressure via their action on arteriolar smooth-muscle cells. Arterial vasodilators primarily relax smooth muscle cells in muscular arteries and therefore de-

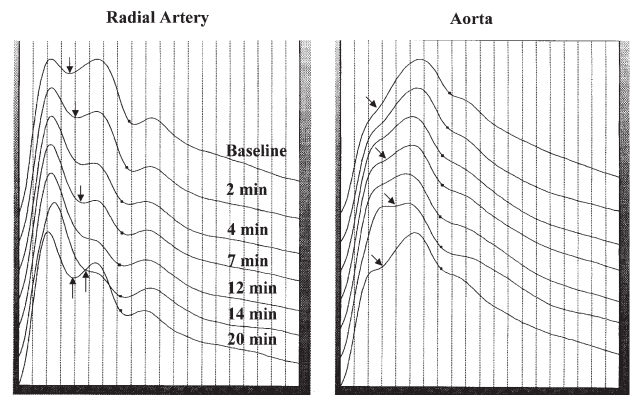

**FIG. 4** Radial artery (left) and aortic (right) pressure waves in a 63-year-old man before (baseline) and after sublingual nitroglycerin (0.4 mg). **Arrows** indicate the beginning upstroke of the respective reflected wave. This vasodilator decreases PWV and delays (rightward shift of the wave) the arrival of the reflected wave in the aorta and radial artery, thus decreasing its amplitude and causing a marked decrease in aortic systolic and pulse pressures. The  $AI_r$  decreased from 100% to 53%, whereas  $AI_a$  decreased from 32% to 3.0%. Abbreviations as in Fig. 1.

crease PWV, wave reflection amplitude and duration, and reduce central systolic and pulse pressures more than brachial cuff pressure components.<sup>25,31–35</sup> Currently available vasodilator drugs have little direct action on elastic arteries, and although drugs are being developed to directly reduce elastic artery stiffness directly, none are currently available for routine clinical use.

Acute reduction in augmentation index can be achieved by drugs that actively dilate muscular arteries accompanied by the passive effects on elastic arteries.<sup>34</sup> These separate actions decrease pressure wave (incident and reflected) propagation along the entire arterial tree and improve wave reflection characteristics. Vasodilator drugs such as ACEI, ARB, calcium channel blockers, nitrates, phosphodiesterase type 5 inhibitors, nitric oxide, and omapatrilat decrease arterial stiffness and PWV and thus reduce wave reflection via delayed return of the reflected wave from the periphery to the heart while decreasing its amplitude and systolic duration.<sup>31–35</sup> Morphologically, the reflected wave (second pressure peak) on the radial pressure wave migrates rightward and down. These modifications of reflected wave characteristics reduce central systolic and pulse pressure, augmentation index (radial and aortic), and wasted pressure energy, which leads to regression of LV hypertrophy.<sup>56,58</sup> The effects of vasodilator drugs on brachial and radial artery systolic and pulse pressures are much less pronounced than their effects on central artery pressure. This is illustrated in Fig. 4, which shows a patient's response during sublingual administration of nitroglycerin.

Differences in central and peripheral pressure-lowering effects by vasodilator drugs, as illustrated in Figs. 4 and 5, strongly suggest that the beneficial cardiac effects of vasodilator drugs has been grossly underestimated in studies that measure brachial artery cuff BP with no central pres-

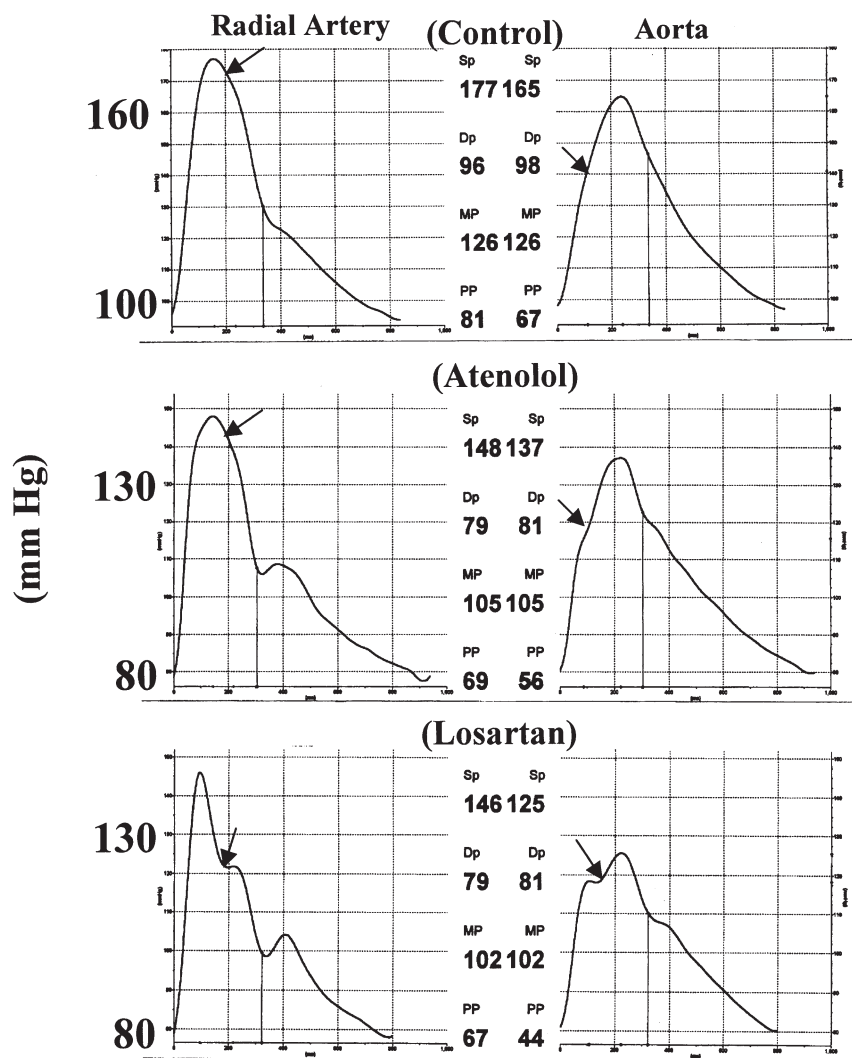

**FIG. 5** Noninvasive recordings of radial artery pressure waves (**left**) and synthesized aortic pressure waves (**right**) illustrate the different effects of a  $\beta$ -blocker (atenolol) and an angiotensin receptor blocker (losartan) on central and peripheral arterial pressure wave shapes in a hypertensive patient. **Arrows** denote the beginning of the reflected wave. The waves are scaled to the pressures published in the Losartan Intervention For Endpoint Reduction in Hypertension study (LIFE) trial (see text for explanation).

sure determination. In the Regression of Arterial Stiffness in a Controlled Double Blind Study (REASON) trial,<sup>31,32</sup> the ACEI perindopril decreased synthesized aortic systolic and pulse pressures significantly more than the  $\beta$ -blocker atenolol even though the drugs lowered elastic artery PWV by the same amount. Based upon the above observations, the apparent “pressure-independent” benefits of vasodilator drugs in clinical trials such as the Heart Outcomes Prevention Evaluation (HOPE) trial<sup>57</sup> may accrue in large part to unmeasured but significant reductions in central (but not peripheral) systolic and pulse pressures. Accordingly, it would be expected that the beneficial effects of ACEI, including regression of LV hypertrophy,<sup>58</sup> are not really independent of changes in arterial BP simply, that the sphygmomanometer method does not measure the “right” BP (that is, the pressure the heart pumps against). The same reasoning can easily explain why the ARB losartan was more effective than atenolol in reducing

LV mass and cardiovascular mortality in the Losartan Intervention For Endpoint Reduction in Hypertension (LIFE) study.<sup>55,56</sup> In the LIFE trial, atenolol and losartan reduced brachial systolic and pulse pressure the same amount. However, as illustrated in Fig. 5, atenolol reduced aortic systolic and pulse pressure 28 and 11 mm Hg, respectively, whereas losartan reduced aortic systolic and pulse pressure 40 and 23 mm Hg, respectively. Atenolol had little effect on radial and aortic augmentation indices, whereas losartan had a marked lowering effect.

## References

1. Tozawa M, Iseki K, Iseki C, Takishita S: Pulse pressure and risk of total mortality and cardiovascular events in patients on chronic hemodialysis. *Kidney Int* 2002;61:717–726.

2. He J, Whelton PK: Elevated systolic blood pressure and risk of cardiovascular and renal disease: overview of evidence from observational epidemiologic studies and randomized controlled trials. *Am Heart J* 1999;138:211-219.
3. Van Bortel LM, Struijker-Boudier HA, Safar ME: Pulse pressure, arterial stiffness, and drug treatment of hypertension. *Hypertension* 2001;38:914-921.
4. Domanski M, Norman J, Wolz M, Mitchell G, Pfeffer M: Cardiovascular risk assessment using pulse pressure in the first national health and nutrition examination survey (NHANES I). *Hypertension* 2001;38:793-797.
5. Gasowski J, Fagard RH, Staessen JA, Grodzicki T, Pocock S, Boutitie F, Gueyffier F, Boissel JP, INDANA Project Collaborators: Pulsatile blood pressure component as predictor of mortality in hypertension: a meta-analysis of clinical trial control groups. *J Hypertens* 2002;20:145-151.
6. Safar ME, Levy BI, Struijker-Boudier H: Current perspectives on arterial stiffness and pulse pressure in hypertension and cardiovascular diseases. *Circulation* 2003;107:2864-2869.
7. Franklin SS, Larson MG, Khan SA, Wong ND, Leip EP, Kannel WB, Levy D: Does the relation of blood pressure to coronary heart disease risk change with aging? The Framingham Heart Study. *Circulation* 2001;103:1245-1249.
8. Boutitie F, Gueyffier F, Pocock S, Fagard R, Boissel JP, INDANA Project Steering Committee: INdividual Data ANalysis of Antihypertensive intervention. J-shaped relationship between blood pressure and mortality in hypertensive patients: new insights from a meta-analysis of individual-patient data. *Ann Intern Med* 2002;136:438-448.
9. Safar ME, Levy BI, Struijker-Boudier H: Current perspectives on arterial stiffness and pulse pressure in hypertension and cardiovascular diseases. *Circulation* 2003;107:2864-2869.
10. Boutouyrie P, Tropeano AI, Asmar R, Gautier I, Benetos A, Lacolley P, Laurent S: Aortic stiffness is an independent predictor of primary coronary events in hypertensive patients: a longitudinal study. *Hypertension* 2002;39:10-15.
11. Nichols WW, O'Rourke MF, Avolio AP, Yaginuma T, Murgu JP, Pepine CJ, Conti CR: Effects of age on ventricular-vascular coupling. *Am J Cardiol* 1985;55:1179-1184.
12. Weber T, Auer J, O'Rourke MF, Kvas E, Lassnig E, Berent R, Eber B: Arterial stiffness, wave reflections, and the risk of coronary artery disease. *Circulation* 2004;109:184-189.
13. Hirai T, Sasayama S, Kawasaki T, Yagi S: Stiffness of systemic arteries in patients with myocardial infarction. A noninvasive method to predict severity of coronary atherosclerosis. *Circulation* 1989;80:78-86.
14. Nichols WW, Pepine CJ: Ventricular/vascular interaction in health and heart failure. *Compr Ther* 1992;18:12-19.
15. Laurent S, Boutouyrie P, Asmar R, Gautier I, Laloux B, Guize L, Ducimetiere P, Benetos A: Aortic stiffness is an independent predictor of all-cause and cardiovascular mortality in hypertensive patients. *Hypertension* 2001;37:1236-1241.
16. Safar ME, Smulyan H: Hypertension in women. *Am J Hypertens* 2004;17:82-87.
17. Laurent S, Katsahian S, Fassot C, Tropeano AI, Gautier I, Laloux B, Boutouyrie P: Aortic stiffness is an independent predictor of fatal stroke in essential hypertension. *Stroke* 2003;34:1203-1206.
18. Wilkinson IB, MacCallum H, Rooijmans DF, Murray GD, Cockcroft JR, McKnight JA, Webb DJ: Increased augmentation index and systolic stress in type 1 diabetes mellitus. *Q J Med* 2000;93:441-448.
19. Schram MT, Henry RM, van Dijk RA, Kostense PJ, Dekker JM, Nijpels G, Heine RJ, Bouter LM, Westerhof N, Stehouwer CD: Increased central artery stiffness in impaired glucose metabolism and type 2 diabetes: the Hoorn Study. *Hypertension* 2004;43:176-181.
20. Blacher J, Guerin AP, Pannier B, Marchais SJ, Safar ME, London GM: Impact of aortic stiffness on survival in end-stage renal disease. *Circulation* 1999;99:2434-2439.
21. London GM, Marchais SJ, Guerin AP: Arterial stiffness and function in end-stage renal disease. *Adv Chronic Kidney Dis* 2004;11:202-209.
22. Wilkinson IB, Prasad K, Hall IR, Thomas A, MacCallum H, Webb DJ, Frenneaux MP, Cockcroft JR: Increased central pulse pressure and augmentation index in subjects with hypercholesterolemia. *J Am Coll Cardiol* 2002;39:1005-1011.
23. Booth AD, Wallace S, McEniery CM, Yasmin, Brown J, Jayne DR, Wilkinson IB: Inflammation and arterial stiffness in systemic vasculitis: a model of vascular inflammation. *Arthritis Rheum* 2004;50:581-588.
24. Yasmin, McEniery CM, Wallace S, Mackenzie IS, Cockcroft JR, Wilkinson IB: C-reactive protein is associated with arterial stiffness in apparently healthy individuals. *Arterioscler Thromb Vasc Biol* 2004;24:969-974.
25. Nichols WW, O'Rourke MF: McDonald's Blood Flow in Arteries: Theoretic, Experimental and Clinical Principles. 5th ed. Edward Arnold, London, 2005.
26. Brown DW, Giles WH, Croft JB: Left ventricular hypertrophy as a predictor of coronary heart disease mortality and the effect of hypertension. *Am Heart J* 2000;140:848-856.
27. Boutouyrie P, Bussy C, Lacolley P, Girerd X, Laloux B, Laurent S: Association between local pulse pressure, mean blood pressure, and large-artery remodeling. *Circulation* 1999;100:1387-1393.
28. Nakayama Y, Tsumura K, Yamashita N, Yoshimaru K, Hayashi T: Pulsatility of ascending aortic pressure waveform is a powerful predictor of restenosis after percutaneous transluminal coronary angioplasty. *Circulation* 2000;101:470-472.
29. Waddell TK, Dart AM, Medley TL, Cameron JD, Kingwell BA: Carotid pressure is a better predictor of coronary artery disease severity than brachial pressure. *Hypertension* 2001;38:927-931.
30. Safar ME, Blacher J, Pannier B, Guerin AP, Marchais SJ, Guyonvarc'h PM, London GM: Central pulse pressure and mortality in end-stage renal disease. *Hypertension* 2002;39:735-738.
31. Asmar RG, London GM, O'Rourke ME, Safar ME: Improvement in blood pressure, arterial stiffness and wave reflections with a very-low-dose perindopril/indapamide combination in hypertensive patient: a comparison with atenolol. *Hypertension* 2001;38:922-926.
32. London GM, Asmar RG, O'Rourke MF, Safar ME, REASON Project Investigators: Mechanism(s) of selective systolic blood pressure reduction after a low-dose combination of perindopril/indapamide in hypertensive subjects: comparison with atenolol. *J Am Coll Cardiol* 2004;43:92-99.
33. O'Rourke MF, Pauca AL: Augmentation of the aortic and central arterial pressure waveform. *Blood Press Monit* 2004;9:179-185.
34. Nichols WW, Edwards DG: Arterial elastance and wave reflection augmentation of systolic blood pressure: deleterious effects and implications for therapy. *J Cardiovasc Pharmacol Ther* 2001;6:5-21.
35. Nichols WW, Singh BM: Augmentation index as a measure of peripheral vascular disease state. *Curr Opin Cardiol* 2002;17:543-551.
36. London GM, Pannier B, Vicaute E, Guerin AP, Marchais SJ, Safar ME, Cuche JL: Antihypertensive effects and arterial haemodynamic alterations during angiotensin converting enzyme inhibition. *J Hypertens* 1996;14:1139-1146.
37. Boutouyrie P, Bussy C, Hayoz D, Hengstler J, Dartois N, Laloux B, Brunner H, Laurent S: Local pulse pressure and regression of arterial wall hypertrophy during long-term antihypertensive treatment. *Circulation* 2000;101:2601-2606.
38. Pauca AL, Kon ND, O'Rourke MF: The second peak of the radial artery pressure wave represents aortic systolic pressure in hypertensive and elderly patients. *Br J Anaesth* 2004;92:651-657.
39. Millasseau SC, Patel SJ, Redwood SR, Ritter JM, Chowienczyk PJ: Pressure wave reflection assessed from the peripheral pulse: is a transfer function necessary? *Hypertension* 2003;41:1016-1020.

40. Millasseau SC, Kelly RP, Ritter JM, Chowienczyk PJ: Determination of age-related increases in large artery stiffness by digital pulse contour analysis. *Clin Sci (Lond)* 2002;103:371–377.
41. Wilkinson IB, MacCallum H, Flint L, Cockcroft JR, Newby DE, Webb DJ: The influence of heart rate on augmentation index and central arterial pressure in humans. *J Physiol* 2000;525:263–270.
42. Laurent P, Albaladejo P, Blacher J, Rudnichi A, Smulyan H, Safar ME: Heart rate and pulse pressure amplification in hypertensive subjects. *Am J Hypertens* 2003;16:363–370.
43. Gatzka CD, Kingwell BA, Cameron JD, Berry KL, Liang YL, Dewar EM, Reid CM, Jennings GL, Dart AM: Gender differences in the timing of arterial wave reflection beyond differences in body height. *J Hypertens* 2001;19:2197–2203.
44. Bortolotto LA, Hanon O, Franconi G, Boutouyrie P, Legrain S, Girerd X: The aging process modifies the distensibility of elastic but not muscular arteries. *Hypertension* 1999;34:889–892.
45. Franklin SS, Gustin W4th, Wong ND, Larson MG, Weber MA, Kannel WB, Levy D: Hemodynamic patterns of age-related changes in blood pressure. The Framingham Heart Study. *Circulation* 1997;96:308–315.
46. Vlachopoulos C, Alexopoulos N, Panagiotakos D, O'Rourke MF, Stefanadis C: Cigar smoking has an acute detrimental effect on arterial stiffness. *Am J Hypertens* 2004;17:299–303.
47. Danias PG, Tritos NA, Stuber M, Botnar RM, Kissinger KV, Manning WJ: Comparison of aortic elasticity determined by cardiovascular magnetic resonance imaging in obese versus lean adults. *Am J Cardiol* 2003;91:195–199.
48. Mahmud A, Feely J: Divergent effect of acute and chronic alcohol on arterial stiffness. *J Hypertens* 2002;15:240–243.
49. Marchais SJ, Guerin AP, Pannier BM, Levy BI, Safar ME, London GM: Wave reflections and cardiac hypertrophy in chronic uremia. Influence of body size. *Hypertension* 1993;22:876–883.
50. Brown DW, Giles WH, Croft JB: Left ventricular hypertrophy as a predictor of coronary heart disease mortality and the effect of hypertension. *Am Heart J* 2000;140:848–856.
51. Levy D, Garrison RJ, Savage DD, Kannel WB, Castelli WP: Prognostic implications of echocardiographically determined left ventricular mass in the Framingham Heart Study. *N Engl J Med* 1990;31:1561–1566.
52. Davis BR, Cutler JA, Furberg CD, Wright JT, Farber MA, Felicetta JV, Stokes JD, ALLHAT Collaborative Research Group: Relationship of antihypertensive treatment regimens and change in blood pressure to risk for heart failure in hypertensive patients randomly assigned to doxazosin or chlorthalidone: further analyses from the Antihypertensive and Lipid-Lowering treatment to prevent Heart Attack Trial. *Ann Intern Med* 2002;137:313–320.
53. Weber MA, Julius S, Kjeldsen SE, Brunner HR, Ekman S, Hansson L, Hua T, Laragh JH, McInnes GT, Mitchell L, Plat F, Schork MA, Smith B, Zanchetti A: Blood pressure dependent and independent effects of antihypertensive treatment on clinical events in the VALUE Trial. *Lancet* 2004;363:2049–2051.
54. Dahlöf B, Devereux RB, Kjeldsen SE, Julius S, Beevers G, de Faire U, Fyhrquist F, Ibsen H, Kristiansson K, Lederballe-Pedersen O, Lindholm LH, Nieminen MS, Omvik P, Oparil S, Wedel H, LIFE Study Group: Cardiovascular morbidity and mortality in the Losartan Intervention For Endpoint Reduction in Hypertension study (LIFE): a randomised trial against atenolol. *Lancet* 2002;359:995–1003.
55. Kjeldsen SE, Dahlöf B, Devereux RB, Julius S, Aurup P, Edelman J, Beevers G, de Faire U, Fyhrquist F, Ibsen H, Kristiansson K, Lederballe-Pedersen O, Lindholm LH, Nieminen MS, Omvik P, Oparil S, Snapinn S, Wedel H, Losartan Intervention for Endpoint Reduction (LIFE) Study Group: Effects of losartan on cardiovascular morbidity and mortality in patients with isolated systolic hypertension and left ventricular hypertrophy: a Losartan Intervention for Endpoint Reduction (LIFE) substudy. *J Am Med Assoc* 2002;288:1491–1498.
56. Suzuki H, Nakamoto H, Okada H, Sugahara S, Kanno Y: A selective angiotensin receptor antagonist, valsartan, produced regression of left ventricular hypertrophy associated with a reduction of arterial stiffness. *Adv Perit Dial* 2003;19:59–66.
57. Yusuf S, Sleight P, Pogue J, Bosch J, Davies R, Dagenais G: Effects of an angiotensin-converting-enzyme inhibitor, ramipril, on cardiovascular events in high-risk patients. The Heart Outcomes Prevention Evaluation Study Investigators. *N Engl J Med* 2000;342:145–153.
58. Lonn E, Shaikholsami R, Yi Q, Bosch J, Sullivan B, Tanser P, Magi A, Yusuf S: Effects of ramipril on left ventricular mass and function in cardiovascular patients with controlled blood pressure and with preserved left ventricular ejection fraction: a substudy of the Heart Outcomes Prevention Evaluation (HOPE) Trial. *J Am Coll Cardiol* 2004;43:2200–2206.
59. Chobanian AV, Bakris GL, Black HR, Cushman WC, Green LA, Izzo JL Jr, Jones DW, Materson BJ, Oparil S, Wright JT Jr, Roccella EJ, National Heart, Lung, and Blood Institute Joint National Committee on Prevention, Detection, Evaluation, and Treatment of High Blood Pressure; National High Blood Pressure Education Program Coordinating Committee: The Seventh Report of the Joint National Committee on Prevention, Detection, Evaluation, and Treatment of High Blood Pressure: the JNC 7 report. *J Am Med Assoc* 2003;289:2560–2572.
60. Lawes CM, Bennett DA, Feigin VL, Rodgers A: Blood pressure and stroke: an overview of published reviews. *Stroke* 2004;35:1024–1033.
61. O'Rourke MF: Wave travel and reflection in the arterial system. *J Hypertens* 1999;17(Suppl 5):S45–S47.
